# Supplementary material for: Identification of Candidate Cotton Genes Associated With Fiber Length Through Quantitative Trait Loci Mapping and RNA-Sequencing Using a Chromosome Segment Substitution Line
Source: Frontiers journal article supplement (doi:10.3389/fpls.2021.796722), 2021-12-14
Supplement: Table_3.XLS [file Table_3.XLS]

## Sheet: 59个差异表达基因
The significantly differentially expressed in these four QTL regions between the two parents
GeneName	GFOLD.0.01.	E.FDR	log2fdc	X1stRPKM	X2ndRPKM	significant	ArabidopsisID	ArabDesc	Swissprot_id	SwissProt_desc	Trembl_id	Trembl_desc	KEGG_id	KEGG_desc	Pfam_ids	InterProt_ids	GO_ids	NR_ids	NR_desc
GH_A12G1722	-0.652823	1	-0.728534	29353.6	20067.7	TRUE	AT2G02010	glutamate decarboxylase 4	Q9ZPS3	DCE4_ARATH Glutamate decarboxylase 4 OS=Arabidopsis thaliana GN=GAD4 PE=1 SV=1	A0A0B0NL97	A0A0B0NL97_GOSAR Glutamate decarboxylase OS=Gossypium arboreum GN=F383_20124 PE=3 SV=1	tcc:TCM_011174	Glutamate decarboxylase 4 isoform 1; K01580 glutamate decarboxylase [EC:4.1.1.15]	PF00282|Pyridoxal-dependent decarboxylase conserved domain	IPR002129|Pyridoxal phosphate-dependent decarboxylase	biological_process:GO:0006536|glutamate metabolic process;molecular_function:GO:0004351|glutamate decarboxylase activity;GO:0030170|pyridoxal phosphate binding;	gi|728833984|gb|KHG13427.1|	Glutamate decarboxylase 1 -like protein [Gossypium arboreum]
GH_A12G1754	3.43945	1	6.20602	0	597.852	TRUE	AT1G05210	Transmembrane protein 97%2C Putative	Q6DFQ5	TMM97_XENTR Transmembrane protein 97 OS=Xenopus tropicalis GN=tmem97 PE=2 SV=1	A0A0B0NC56	A0A0B0NC56_GOSAR Transmembrane 97 OS=Gossypium arboreum GN=F383_18592 PE=4 SV=1	-	-	PF10914|Protein of unknown function (DUF2781)	IPR033118|EXPERA domain	cellular_component:GO:0016021|integral component of membrane;	gi|728832700|gb|KHG12143.1|	Transmembrane 97 [Gossypium arboreum]
GH_A12G1755	3.85582	1	5.30387	28.8488	1608.38	TRUE	AT1G05210	Transmembrane protein 97%2C Putative	Q6DFQ5	TMM97_XENTR Transmembrane protein 97 OS=Xenopus tropicalis GN=tmem97 PE=2 SV=1	A0A0B0P811	A0A0B0P811_GOSAR Transmembrane 97 OS=Gossypium arboreum GN=F383_27179 PE=4 SV=1	-	-	PF10914|Protein of unknown function (DUF2781)	IPR033118|EXPERA domain	cellular_component:GO:0016021|integral component of membrane;	gi|728841757|gb|KHG21200.1|	Transmembrane 97 [Gossypium arboreum]
GH_A12G1760	1.29449	1	1.7357	447.156	1708.9	TRUE	AT2G05710	aconitase 3	P49608	ACOC_CUCMA Aconitate hydratase, cytoplasmic OS=Cucurbita maxima PE=2 SV=1	A0A0D2T213	A0A0D2T213_GOSRA Aconitate hydratase OS=Gossypium raimondii GN=B456_008G173400 PE=3 SV=1	tcc:TCM_011347	Aconitase 3; K01681 aconitate hydratase [EC:4.2.1.3]	PF00694|Aconitase C-terminal domain	IPR000573|Aconitase A/isopropylmalate dehydratase small subunit, swivel domain;IPR001030|Aconitase/3-isopropylmalate dehydratase large subunit, alpha/beta/alpha domain;IPR015937|Aconitase/isopropylmalate dehydratase;IPR018136|Aconitase family, 4Fe-4S cluster binding site	biological_process:GO:0008152|metabolic process;molecular_function:GO:0003994|aconitate hydratase activity;GO:0051539|4 iron, 4 sulfur cluster binding;	gi|823211091|ref|XP_012438439.1|	PREDICTED: aconitate hydratase, cytoplasmic-like [Gossypium raimondii] &gt;gi|763783408|gb|KJB50479.1| hypothetical protein B456_008G173400 [Gossypium raimondii]
GH_A12G1762	-0.520326	1	-0.831104	1795.84	1142.8	TRUE	AT1G62040	Ubiquitin-like superfamily protein	Q8S927	ATG8C_ARATH Autophagy-related protein 8c OS=Arabidopsis thaliana GN=ATG8C PE=1 SV=1	A0A0D2TUX9	A0A0D2TUX9_GOSRA Autophagy-related protein OS=Gossypium raimondii GN=B456_008G173600 PE=3 SV=1	tcc:TCM_011359	Ubiquitin-like superfamily protein; K08341 GABA(A) receptor-associated protein	PF02991|Autophagy protein Atg8 ubiquitin like	IPR004241|Autophagy protein Atg8 ubiquitin-like	biological_process:GO:0006995|cellular response to nitrogen starvation;GO:0006914|autophagy;cellular_component:GO:0016021|integral component of membrane;	gi|763780024|gb|KJB47095.1|	hypothetical protein B456_008G173600 [Gossypium raimondii]
GH_A12G1764	-1.4993	1	-1.77852	3245.49	1068.73	TRUE	AT3G25590	micronuclear linker histone polyprotein-like protein	-	-	A0A0D2PWG5	A0A0D2PWG5_GOSRA Uncharacterized protein OS=Gossypium raimondii GN=B456_008G173800 PE=4 SV=1	-	-	-	-	-	gi|823201417|ref|XP_012435564.1|	PREDICTED: uncharacterized protein LOC105762216 [Gossypium raimondii] &gt;gi|763783421|gb|KJB50492.1| hypothetical protein B456_008G173800 [Gossypium raimondii]
GH_A12G1802	-0.702727	1	-1.0664	1420.8	767.155	TRUE	AT2G03620	magnesium transporter 3	Q9ZPR4	MRS25_ARATH Magnesium transporter MRS2-5 OS=Arabidopsis thaliana GN=MRS2-5 PE=2 SV=1	A0A0D2RH49	A0A0D2RH49_GOSRA Uncharacterized protein OS=Gossypium raimondii GN=B456_008G177000 PE=4 SV=1	tcc:TCM_011528	Magnesium transporter 3 isoform 1; K16075 magnesium transporter	-	-	biological_process:GO:1903830|magnesium ion transmembrane transport;GO:0015693|magnesium ion transport;cellular_component:GO:0016021|integral component of membrane;molecular_function:GO:0015095|magnesium ion transmembrane transporter activity;	gi|823211292|ref|XP_012438505.1|	PREDICTED: magnesium transporter MRS2-5 [Gossypium raimondii] &gt;gi|823211295|ref|XP_012438506.1| PREDICTED: magnesium transporter MRS2-5 [Gossypium raimondii] &gt;gi|823211298|ref|XP_012438507.1| PREDICTED: magnesium transporter MRS2-5 [Gossypium raimondii] &gt;gi|823211301|ref|XP_012438508.1| PREDICTED: magnesium transporter MRS2-5 [Gossypium raimondii] &gt;gi|763783466|gb|KJB50537.1| hypothet…
GH_A12G1808	1.24919	1	1.63833	591.4	2105.71	TRUE	AT1G18650	plasmodesmata callose-binding protein 3	Q9FZ86	PDCB3_ARATH PLASMODESMATA CALLOSE-BINDING PROTEIN 3 OS=Arabidopsis thaliana GN=PDCB3 PE=1 SV=1	A0A0B0MUU0	A0A0B0MUU0_GOSAR Uncharacterized protein OS=Gossypium arboreum GN=F383_29090 PE=4 SV=1	zma:103647659	extensin-like; K03006 DNA-directed RNA polymerase II subunit RPB1 [EC:2.7.7.6]	PF07983|X8 domain	IPR012946|X8 domain	-	gi|728821054|gb|KHG04147.1|	hypothetical protein F383_29090 [Gossypium arboreum]
GH_A12G1824	-0.759672	1	-1.50134	389.458	153.431	TRUE	AT1G13970	beta-hexosaminidase (DUF1336)	F4JSE7	EDR2_ARATH Protein ENHANCED DISEASE RESISTANCE 2 OS=Arabidopsis thaliana GN=EDR2 PE=2 SV=1	A0A0B0P0W7	A0A0B0P0W7_GOSAR Beta-hexosaminidase OS=Gossypium arboreum GN=F383_05468 PE=4 SV=1	-	-	PF07059|Protein of unknown function (DUF1336)	IPR009769|Protein ENHANCED DISEASE RESISTANCE 2, C-terminal	-	gi|728840900|gb|KHG20343.1|	Beta-hexosaminidase [Gossypium arboreum]
GH_A12G1832	0.564646	1	1.03247	447.156	1047.56	TRUE	AT5G15310	myb domain protein 16	Q8GWP0	MYB39_ARATH Transcription factor MYB39 OS=Arabidopsis thaliana GN=MYB39 PE=2 SV=1	F2W3Z2	F2W3Z2_GOSHI MYB25-like protein OS=Gossypium hirsutum PE=4 SV=1	cit:102616032	transcription factor MYB29-like; K09422 myb proto-oncogene protein, plant	PF00249|Myb-like DNA-binding domain	IPR001005|SANT/Myb domain;IPR017930|Myb domain	molecular_function:GO:0003677|DNA binding;	gi|326631701|gb|ADZ98878.1|	MYB25-like protein [Gossypium hirsutum]
GH_A12G1842	-1.37798	1	-2.90698	238.002	31.7443	TRUE	AT1G26820	ribonuclease 3	P42815	RNS3_ARATH Ribonuclease 3 OS=Arabidopsis thaliana GN=RNS3 PE=2 SV=1	A0A0B0PT83	A0A0B0PT83_GOSAR Ribonuclease 3-like protein OS=Gossypium arboreum GN=F383_12492 PE=3 SV=1	tcc:TCM_011699	Ribonuclease 3; K01166 ribonuclease T2 [EC:3.1.27.1]	PF00445|Ribonuclease T2 family	IPR001568|Ribonuclease T2-like;IPR018188|Ribonuclease T2, His active site 1;IPR033130|Ribonuclease T2, His active site 2	biological_process:GO:0090502|RNA phosphodiester bond hydrolysis, endonucleolytic;molecular_function:GO:0033897|ribonuclease T2 activity;GO:0003723|RNA binding;	gi|728848767|gb|KHG28210.1|	Ribonuclease 3 -like protein [Gossypium arboreum]
GH_A12G1854	-0.742732	1	-1.4463	425.519	174.594	TRUE	AT2G02860	sucrose transporter 2	O80605	SUC3_ARATH Sucrose transport protein SUC3 OS=Arabidopsis thaliana GN=SUC3 PE=1 SV=1	A0A0D2PWZ5	A0A0D2PWZ5_GOSRA Uncharacterized protein OS=Gossypium raimondii GN=B456_008G181900 PE=4 SV=1	tcc:TCM_011763	Sucrose transporter 2 isoform 1; K15378 solute carrier family 45, member 1	PF13347|MFS/sugar transport protein	IPR005989|Sucrose/H+ symporter, plant	biological_process:GO:0015770|sucrose transport;cellular_component:GO:0005887|integral component of plasma membrane;GO:0090406|pollen tube;GO:0005794|Golgi apparatus;molecular_function:GO:0008515|sucrose transmembrane transporter activity;	gi|823211523|ref|XP_012438579.1|	PREDICTED: sucrose transport protein SUC3 isoform X2 [Gossypium raimondii] &gt;gi|763783601|gb|KJB50672.1| hypothetical protein B456_008G181900 [Gossypium raimondii]
GH_A12G1861	0.615743	1	0.871836	1608.32	3343.74	TRUE	AT3G01280	voltage dependent anion channel 1	P42056	VDAC2_SOLTU Mitochondrial outer membrane protein porin of 36 kDa OS=Solanum tuberosum PE=1 SV=2	A0A0D2T895	A0A0D2T895_GOSRA Uncharacterized protein OS=Gossypium raimondii GN=B456_008G182700 PE=4 SV=1	tcc:TCM_011800	Mitochondrial outer membrane protein porin 1 isoform 2; K15040 voltage-dependent anion channel protein 2	PF01459|Eukaryotic porin	IPR001925|Porin, eukaryotic type;IPR027246|Eukaryotic porin/Tom40	biological_process:GO:1903959|regulation of anion transmembrane transport;cellular_component:GO:0005741|mitochondrial outer membrane;molecular_function:GO:0008308|voltage-gated anion channel activity;	gi|823211575|ref|XP_012438596.1|	PREDICTED: mitochondrial outer membrane protein porin of 36 kDa-like [Gossypium raimondii] &gt;gi|763783625|gb|KJB50696.1| hypothetical protein B456_008G182700 [Gossypium raimondii]
GH_A12G1872	0.591087	1	0.682743	13400.3	24374.4	TRUE	AT1G25480	aluminum activated malate transporter family protein	Q9C6L8	ALMT4_ARATH Aluminum-activated malate transporter 4 OS=Arabidopsis thaliana GN=ALMT4 PE=3 SV=1	A0A0B0PTU8	A0A0B0PTU8_GOSAR Aluminum-activated malate transporter 4-like protein OS=Gossypium arboreum GN=F383_15061 PE=4 SV=1	-	-	PF11744|Aluminium activated malate transporter	IPR020966|Aluminum-activated malate transporter	biological_process:GO:0015743|malate transport;cellular_component:GO:0016021|integral component of membrane;	gi|728850460|gb|KHG29903.1|	Aluminum-activated malate transporter 4 -like protein [Gossypium arboreum]
GH_A12G1883	-0.557238	1	-0.764637	3952.28	2634.78	TRUE	AT1G13310	Endosomal targeting BRO1-like domain-containing protein	Q9WU78	PDC6I_MOUSE Programmed cell death 6-interacting protein OS=Mus musculus GN=Pdcd6ip PE=1 SV=3	A0A0D2T2P7	A0A0D2T2P7_GOSRA Uncharacterized protein OS=Gossypium raimondii GN=B456_008G185300 PE=4 SV=1	csl:COCSUDRAFT_29959	BRO1-domain-containing protein; K12200 programmed cell death 6-interacting protein	PF03097|BRO1-like domain	IPR004328|BRO1 domain	-	gi|823211694|ref|XP_012438637.1|	PREDICTED: programmed cell death 6-interacting protein [Gossypium raimondii] &gt;gi|763783668|gb|KJB50739.1| hypothetical protein B456_008G185300 [Gossypium raimondii]
GH_A12G1894	1.46724	1	1.7452	1175.59	4486.53	TRUE	AT1G75290	NAD(P)-binding Rossmann-fold superfamily protein	Q84V83	LAR_DESUN Leucoanthocyanidin reductase OS=Desmodium uncinatum GN=LAR PE=1 SV=1	Q3KN83	Q3KN83_GOSAR Leucoanthocyanidin reductase 1 OS=Gossypium arboreum GN=lar1 PE=2 SV=1	tcc:TCM_011870	Leucoanthocyanidin reductase 1; K13081 leucoanthocyanidin reductase [EC:1.17.1.3]	PF05368|NmrA-like family	IPR008030|NmrA-like domain	-	gi|76559864|tpe|CAI56319.1|	TPA: leucoanthocyanidin reductase 1 [Gossypium arboreum]
GH_A12G1896	1.41206	1	2.09195	165.88	830.644	TRUE	AT1G68810	basic helix-loop-helix (bHLH) DNA-binding superfamily protein	Q9S7Y1	BH030_ARATH Transcription factor bHLH30 OS=Arabidopsis thaliana GN=BHLH30 PE=1 SV=1	A0A0B0N1U5	A0A0B0N1U5_GOSAR Transcription factor bHLH30-like protein OS=Gossypium arboreum GN=F383_03211 PE=4 SV=1	sly:101252303	transcription factor PIF4; K16189 phytochrome-interacting factor 4	PF00010|Helix-loop-helix DNA-binding domain	IPR011598|Myc-type, basic helix-loop-helix (bHLH) domain	molecular_function:GO:0046983|protein dimerization activity;GO:0003677|DNA binding;	gi|728826119|gb|KHG06567.1|	Transcription factor bHLH30 -like protein [Gossypium arboreum]
GH_A12G1902	0.529839	1	1.90364	57.6975	269.827	TRUE	AT1G26100	Cytochrome b561/ferric reductase transmembrane protein family	Q9C540	ACFR4_ARATH Probable transmembrane ascorbate ferrireductase 4 OS=Arabidopsis thaliana GN=CYB561D PE=2 SV=1	A0A0D2T8H9	A0A0D2T8H9_GOSRA Uncharacterized protein OS=Gossypium raimondii GN=B456_008G187200 PE=4 SV=1	tcc:TCM_011882	Cytochrome b561	PF03188|Eukaryotic cytochrome b561	IPR006593|Cytochrome b561/ferric reductase transmembrane	biological_process:GO:0055114|oxidation-reduction process;cellular_component:GO:0016021|integral component of membrane;	gi|763783725|gb|KJB50796.1|	hypothetical protein B456_008G187200 [Gossypium raimondii]
GH_A12G1913	1.44828	1	1.78328	793.341	3116.24	TRUE	-	-	-	-	A0A0B0NLE6	A0A0B0NLE6_GOSAR Uncharacterized protein OS=Gossypium arboreum GN=F383_19432 PE=4 SV=1	-	-	-	-	-	gi|728832453|gb|KHG11896.1|	hypothetical protein F383_19432 [Gossypium arboreum]
GH_A12G1925	-0.722463	1	-0.905587	5329.81	3222.05	TRUE	AT4G16340	guanyl-nucleotide exchange factors%3BGTPase binding%3BGTP binding protein	Q8SAB7	SPK1_ARATH Guanine nucleotide exchange factor SPIKE 1 OS=Arabidopsis thaliana GN=SPK1 PE=1 SV=1	A0A0D2T2Y2	A0A0D2T2Y2_GOSRA Uncharacterized protein OS=Gossypium raimondii GN=B456_008G189300 PE=4 SV=1	-	-	PF06920|Dock homology region 2	IPR010703|Dedicator of cytokinesis, C-terminal;IPR026791|Dedicator of cytokinesis;IPR027007|DHR-1 domain;IPR027357|DHR-2 domain	biological_process:GO:0043547|positive regulation of GTPase activity;GO:0007264|small GTPase mediated signal transduction;cellular_component:GO:0005622|intracellular;molecular_function:GO:0005085|guanyl-nucleotide exchange factor activity;	gi|823211839|ref|XP_012438685.1|	PREDICTED: guanine nucleotide exchange factor SPIKE 1 [Gossypium raimondii] &gt;gi|823211842|ref|XP_012438686.1| PREDICTED: guanine nucleotide exchange factor SPIKE 1 [Gossypium raimondii] &gt;gi|763783772|gb|KJB50843.1| hypothetical protein B456_008G189300 [Gossypium raimondii] &gt;gi|763783773|gb|KJB50844.1| hypothetical protein B456_008G189300 [Gossypium raimondii] &gt;gi|763783774|gb|KJB50845…
GH_A12G1932	-0.550809	1	-1.44401	259.639	105.814	TRUE	AT1G74780	Nodulin-like / Major Facilitator Superfamily protein	F4I9E1	NFD4_ARATH Protein NUCLEAR FUSION DEFECTIVE 4 OS=Arabidopsis thaliana GN=NFD4 PE=3 SV=1	A0A0D2T2Z2	A0A0D2T2Z2_GOSRA Uncharacterized protein OS=Gossypium raimondii GN=B456_008G190000 PE=4 SV=1	aly:ARALYDRAFT_321151	hypothetical protein; K14794 ribosomal RNA-processing protein 12	PF07690|Major Facilitator Superfamily	IPR011701|Major facilitator superfamily;IPR020846|Major facilitator superfamily domain	biological_process:GO:0055085|transmembrane transport;cellular_component:GO:0016021|integral component of membrane;	gi|728851168|gb|KHG30611.1|	putative transporter MCH1 [Gossypium arboreum]
GH_A12G1938	0.607173	1	1.35664	151.456	455.002	TRUE	AT3G01470	homeobox 1	Q02283	HAT5_ARATH Homeobox-leucine zipper protein HAT5 OS=Arabidopsis thaliana GN=HAT5 PE=1 SV=1	A0A0D2U5T4	A0A0D2U5T4_GOSRA Uncharacterized protein OS=Gossypium raimondii GN=B456_008G190300 PE=4 SV=1	cit:102608037	homeobox-leucine zipper protein HAT5-like; K09338 homeobox-leucine zipper protein	PF00046|Homeobox domain	IPR000047|Helix-turn-helix motif;IPR001356|Homeobox domain;IPR003106|Leucine zipper, homeobox-associated;IPR017970|Homeobox, conserved site	biological_process:GO:0006355|regulation of transcription, DNA-templated;cellular_component:GO:0005634|nucleus;molecular_function:GO:0003700|transcription factor activity, sequence-specific DNA binding;GO:0043565|sequence-specific DNA binding;	gi|823211912|ref|XP_012438715.1|	PREDICTED: homeobox-leucine zipper protein HAT5-like isoform X1 [Gossypium raimondii] &gt;gi|763783794|gb|KJB50865.1| hypothetical protein B456_008G190300 [Gossypium raimondii]
GH_A12G1960	3.23048	1	6.00249	0	518.491	TRUE	AT1G26880	Ribosomal protein L34e superfamily protein	Q42351	RL341_ARATH 60S ribosomal protein L34-1 OS=Arabidopsis thaliana GN=RPL34A PE=2 SV=1	A0A0D2PXQ1	A0A0D2PXQ1_GOSRA Uncharacterized protein OS=Gossypium raimondii GN=B456_008G192800 PE=4 SV=1	tcc:TCM_018525	Ribosomal protein L34e superfamily protein; K02915 large subunit ribosomal protein L34e	PF01199|Ribosomal protein L34e	IPR008195|Ribosomal protein L34Ae;IPR018065|Ribosomal protein L34e, conserved site	biological_process:GO:0006412|translation;cellular_component:GO:0005840|ribosome;molecular_function:GO:0003735|structural constituent of ribosome;	gi|823211999|ref|XP_012438754.1|	PREDICTED: 60S ribosomal protein L34-like [Gossypium raimondii] &gt;gi|763783841|gb|KJB50912.1| hypothetical protein B456_008G192800 [Gossypium raimondii]
GH_A12G1972	1.33259	1	2.07357	137.032	682.503	TRUE	AT1G69530	expansin A1	Q9C554	EXPA1_ARATH Expansin-A1 OS=Arabidopsis thaliana GN=EXPA1 PE=2 SV=1	A0A0D2U610	A0A0D2U610_GOSRA Uncharacterized protein OS=Gossypium raimondii GN=B456_008G194200 PE=3 SV=1	obr:102709764	malate dehydrogenase [NADP], chloroplastic-like; K00051 malate dehydrogenase (NADP+) [EC:1.1.1.82]	PF03330|Lytic transglycolase	IPR002963|Expansin;IPR007112|Expansin/pollen allergen, DPBB domain;IPR007117|Expansin, cellulose-binding-like domain;IPR007118|Expansin/Lol pI;IPR009009|RlpA-like protein, double-psi beta-barrel domain	biological_process:GO:0009664|plant-type cell wall organization;cellular_component:GO:0016021|integral component of membrane;GO:0005576|extracellular region;GO:0005618|cell wall;	gi|823212052|ref|XP_012438779.1|	PREDICTED: expansin-A1-like [Gossypium raimondii] &gt;gi|763783874|gb|KJB50945.1| hypothetical protein B456_008G194200 [Gossypium raimondii]
GH_A12G1994	-1.42883	1	-1.61098	7154.49	2650.65	TRUE	AT5G07800	Flavin-binding monooxygenase family protein	Q9FF12	GSXL9_ARATH Flavin-containing monooxygenase FMO GS-OX-like 9 OS=Arabidopsis thaliana GN=At5g07800 PE=2 SV=1	A0A0B0PFD5	A0A0B0PFD5_GOSAR Flavin-containing monooxygenase OS=Gossypium arboreum GN=F383_01958 PE=3 SV=1	csv:101203913	indole-3-pyruvate monooxygenase YUCCA6; K11816 indole-3-pyruvate monooxygenase [EC:1.14.13.168]	PF00743|Flavin-binding monooxygenase-like	IPR000960|Flavin monooxygenase FMO;IPR020946|Flavin monooxygenase-like	biological_process:GO:0055114|oxidation-reduction process;molecular_function:GO:0004499|N,N-dimethylaniline monooxygenase activity;GO:0050660|flavin adenine dinucleotide binding;GO:0050661|NADP binding;	gi|728834537|gb|KHG13980.1|	hypothetical protein F383_01958 [Gossypium arboreum] &gt;gi|728842673|gb|KHG22116.1| hypothetical protein F383_09997 [Gossypium arboreum]
GH_A12G2002	0.654754	1	2.12036	43.2731	243.373	TRUE	AT5G58750	NAD(P)-binding Rossmann-fold superfamily protein	Q9STX2	VEP1_ARATH 3-oxo-Delta(4,5)-steroid 5-beta-reductase OS=Arabidopsis thaliana GN=VEP1 PE=1 SV=1	A0A0D2T3K9	A0A0D2T3K9_GOSRA Uncharacterized protein OS=Gossypium raimondii GN=B456_008G197000 PE=4 SV=1	-	-	PF01370|NAD dependent epimerase/dehydratase family	IPR001509|NAD-dependent epimerase/dehydratase, N-terminal domain	molecular_function:GO:0003824|catalytic activity;GO:0050662|coenzyme binding;	gi|823212171|ref|XP_012438839.1|	PREDICTED: 3-oxo-Delta(4,5)-steroid 5-beta-reductase [Gossypium raimondii] &gt;gi|763783938|gb|KJB51009.1| hypothetical protein B456_008G197000 [Gossypium raimondii]
GH_A12G2012	3.17602	1	4.36861	64.9097	1682.45	TRUE	AT5G07990	Cytochrome P450 superfamily protein	Q9SBQ9	F3PH_PETHY Flavonoid 3'-monooxygenase OS=Petunia hybrida GN=CYP75B2 PE=2 SV=1	A0A0B0N5H6	A0A0B0N5H6_GOSAR Flavonoid 3',5'-hydroxylase OS=Gossypium arboreum GN=F383_11367 PE=3 SV=1	tcc:TCM_014241	Flavonoid 3'-hydroxylase isoform 1; K05280 flavonoid 3'-monooxygenase [EC:1.14.13.21]	PF00067|Cytochrome P450	IPR001128|Cytochrome P450;IPR002401|Cytochrome P450, E-class, group I;IPR017972|Cytochrome P450, conserved site	biological_process:GO:0055114|oxidation-reduction process;cellular_component:GO:0016021|integral component of membrane;molecular_function:GO:0016705|oxidoreductase activity, acting on paired donors, with incorporation or reduction of molecular oxygen;GO:0020037|heme binding;GO:0005506|iron ion binding;GO:0004497|monooxygenase activity;	gi|728828479|gb|KHG07922.1|	Flavonoid 3&apos;,5&apos;-hydroxylase [Gossypium arboreum]
GH_A12G2014	1.28168	1	1.82599	281.275	1153.38	TRUE	AT1G18650	plasmodesmata callose-binding protein 3	Q9FZ86	PDCB3_ARATH PLASMODESMATA CALLOSE-BINDING PROTEIN 3 OS=Arabidopsis thaliana GN=PDCB3 PE=1 SV=1	A0A0B0MR25	A0A0B0MR25_GOSAR Uncharacterized protein OS=Gossypium arboreum GN=F383_15049 PE=4 SV=1	zma:103647659	extensin-like; K03006 DNA-directed RNA polymerase II subunit RPB1 [EC:2.7.7.6]	PF07983|X8 domain	IPR012946|X8 domain	biological_process:GO:0009408|response to heat;GO:0052543|callose deposition in cell wall;cellular_component:GO:0046658|anchored component of plasma membrane;GO:0009505|plant-type cell wall;molecular_function:GO:0001872|(1->3)-beta-D-glucan binding;GO:0004553|hydrolase activity, hydrolyzing O-glycosyl compounds;	gi|728819498|gb|KHG03210.1|	hypothetical protein F383_26843 [Gossypium arboreum] &gt;gi|728830845|gb|KHG10288.1| hypothetical protein F383_15049 [Gossypium arboreum]
GH_A12G2220	-2.1679	1	-2.48303	3570.03	719.538	TRUE	AT4G19170	nine-cis-epoxycarotenoid dioxygenase 4	O49675	CCD4_ARATH Probable carotenoid cleavage dioxygenase 4, chloroplastic OS=Arabidopsis thaliana GN=CCD4 PE=1 SV=1	A0A0D2RK31	A0A0D2RK31_GOSRA Uncharacterized protein OS=Gossypium raimondii GN=B456_008G219800 PE=4 SV=1	tcc:TCM_016684	Nine-cis-epoxycarotenoid dioxygenase 4; K09840 9-cis-epoxycarotenoid dioxygenase [EC:1.13.11.51]	PF03055|Retinal pigment epithelial membrane protein	IPR004294|Carotenoid oxygenase	biological_process:GO:0055114|oxidation-reduction process;molecular_function:GO:0016702|oxidoreductase activity, acting on single donors with incorporation of molecular oxygen, incorporation of two atoms of oxygen;	gi|823212937|ref|XP_012439211.1|	PREDICTED: probable carotenoid cleavage dioxygenase 4, chloroplastic [Gossypium raimondii] &gt;gi|763784437|gb|KJB51508.1| hypothetical protein B456_008G219800 [Gossypium raimondii]
GH_A12G2228	-0.73185	1	-0.826757	19335.9	12348.5	TRUE	AT4G19110	Protein kinase superfamily protein	Q6Z8C8	CDKF4_ORYSJ Cyclin-dependent kinase F-4 OS=Oryza sativa subsp. japonica GN=CDKF-4 PE=2 SV=1	A0A0B0MEA2	A0A0B0MEA2_GOSAR Cyclin-dependent kinase F-4 OS=Gossypium arboreum GN=F383_14564 PE=4 SV=1	tcc:TCM_016670	Kinase superfamily protein isoform 1; K08829 male germ cell-associated kinase [EC:2.7.11.22]	PF00069|Protein kinase domain	IPR000719|Protein kinase domain;IPR008271|Serine/threonine-protein kinase, active site;IPR017441|Protein kinase, ATP binding site	biological_process:GO:0006468|protein phosphorylation;molecular_function:GO:0004674|protein serine/threonine kinase activity;GO:0005524|ATP binding;	gi|728807684|gb|KHF97733.1|	Cyclin-dependent kinase F-4 [Gossypium arboreum]
GH_A12G2233	0.683378	1	1.63186	93.7585	349.188	TRUE	AT4G19060	P-loop containing nucleoside triphosphate hydrolases superfamily protein	Q84WD3	DRL26_ARATH Probable disease resistance protein At4g19060 OS=Arabidopsis thaliana GN=At4g19060 PE=2 SV=2	A0A0D2RK54	A0A0D2RK54_GOSRA Uncharacterized protein OS=Gossypium raimondii GN=B456_008G221200 PE=4 SV=1	jcu:105646264	diacylglycerol kinase 5-like; K00901 diacylglycerol kinase (ATP) [EC:2.7.1.107]	PF00931|NB-ARC domain	IPR002182|NB-ARC	molecular_function:GO:0005488|binding;GO:0016787|hydrolase activity;	gi|763784467|gb|KJB51538.1|	hypothetical protein B456_008G221200 [Gossypium raimondii]
GH_A12G2235	0.56637	1	0.943592	714.007	1566.05	TRUE	AT5G45530	transmembrane protein%2C putative (DUF594)	-	-	A0A0D2U7N5	A0A0D2U7N5_GOSRA Uncharacterized protein OS=Gossypium raimondii GN=B456_008G221400 PE=4 SV=1	obr:102722400	uncharacterized LOC102722400; K12486 stromal membrane-associated protein	PF13968|Domain of unknown function (DUF4220)	IPR007658|Protein of unknown function DUF594;IPR025315|Domain of unknown function DUF4220	cellular_component:GO:0016021|integral component of membrane;	gi|823212995|ref|XP_012439239.1|	PREDICTED: uncharacterized protein LOC105764956 [Gossypium raimondii] &gt;gi|763784469|gb|KJB51540.1| hypothetical protein B456_008G221400 [Gossypium raimondii]
GH_A12G2245	0.99302	1	1.43116	476.005	1470.82	TRUE	AT2G45550	cytochrome P450%2C family 76%2C subfamily C%2C polypeptide 4	Q8VWZ7	C76B6_CATRO Geraniol 8-hydroxylase OS=Catharanthus roseus GN=CYP76B6 PE=1 SV=1	A0A0B0PK52	A0A0B0PK52_GOSAR Cytochrome P450 protein OS=Gossypium arboreum GN=F383_06491 PE=3 SV=1	osa:4348172	Os10g0166600; K00517	PF00067|Cytochrome P450	IPR001128|Cytochrome P450;IPR002401|Cytochrome P450, E-class, group I;IPR017972|Cytochrome P450, conserved site	biological_process:GO:0055114|oxidation-reduction process;molecular_function:GO:0016705|oxidoreductase activity, acting on paired donors, with incorporation or reduction of molecular oxygen;GO:0020037|heme binding;GO:0005506|iron ion binding;	gi|728847385|gb|KHG26828.1|	Cytochrome P450 protein [Gossypium arboreum]
GH_A12G2259	-0.889459	1	-0.998177	15693.7	8899	TRUE	AT3G03050	cellulose synthase-like D3	Q9M9M4	CSLD3_ARATH Cellulose synthase-like protein D3 OS=Arabidopsis thaliana GN=CSLD3 PE=1 SV=1	A0A0B0MSM0	A0A0B0MSM0_GOSAR Cellulose synthase-like protein D3 OS=Gossypium arboreum GN=F383_02066 PE=4 SV=1	egu:105052561	cellulose synthase-like protein D5; K00770 1,4-beta-D-xylan synthase [EC:2.4.2.24]	PF14570|RING/Ubox like zinc-binding domain	IPR005150|Cellulose synthase	biological_process:GO:0071555|cell wall organization;GO:0030244|cellulose biosynthetic process;cellular_component:GO:0016021|integral component of membrane;molecular_function:GO:0016760|cellulose synthase (UDP-forming) activity;	gi|728815711|gb|KHG01931.1|	Cellulose synthase-like protein D3 [Gossypium arboreum]
GH_A12G2328	2.45572	1	5.25577	0	306.862	TRUE	AT5G47070	Protein kinase superfamily protein	Q9LTC0	Y5707_ARATH Probable receptor-like protein kinase At5g47070 OS=Arabidopsis thaliana GN=At5g47070 PE=1 SV=1	A0A0B0PW83	A0A0B0PW83_GOSAR Uncharacterized protein OS=Gossypium arboreum GN=F383_14963 PE=3 SV=1	tcc:TCM_015814	Receptor protein kinase isoform 1; K00924	PF00069|Protein kinase domain	IPR000719|Protein kinase domain;IPR008271|Serine/threonine-protein kinase, active site	biological_process:GO:0006468|protein phosphorylation;molecular_function:GO:0004674|protein serine/threonine kinase activity;GO:0005524|ATP binding;	gi|728849256|gb|KHG28699.1|	hypothetical protein F383_14963 [Gossypium arboreum]
GH_A12G2349	0.747155	1	1.83256	79.3341	343.897	TRUE	AT4G17500	ethylene responsive element binding factor 1	O80337	EF100_ARATH Ethylene-responsive transcription factor 1A OS=Arabidopsis thaliana GN=ERF1A PE=1 SV=2	G8XR11	G8XR11_GOSHI AP2	cit:102614159	ethylene-responsive transcription factor 1A-like; K09286 EREBP-like factor	PF00847|AP2 domain	IPR001471|AP2/ERF domain	biological_process:GO:0006355|regulation of transcription, DNA-templated;cellular_component:GO:0005634|nucleus;molecular_function:GO:0003677|DNA binding;GO:0003700|transcription factor activity, sequence-specific DNA binding;	gi|213950351|gb|ACJ54440.1|	AP2
GH_A12G2356	0.568973	1	1.02038	483.217	1121.63	TRUE	AT5G47370	Homeobox-leucine zipper protein 4 (HB-4) / HD-ZIP protein	P46601	HAT2_ARATH Homeobox-leucine zipper protein HAT2 OS=Arabidopsis thaliana GN=HAT2 PE=1 SV=2	A0A0B0N8D8	A0A0B0N8D8_GOSAR Homeobox-leucine zipper HAT4-like protein OS=Gossypium arboreum GN=F383_34385 PE=4 SV=1	tcc:TCM_015919	Homeobox-leucine zipper protein 4	PF02183|Homeobox associated leucine zipper	IPR000047|Helix-turn-helix motif;IPR001356|Homeobox domain;IPR003106|Leucine zipper, homeobox-associated;IPR006712|HD-ZIP protein, N-terminal;IPR017970|Homeobox, conserved site	biological_process:GO:0048364|root development;GO:0009826|unidimensional cell growth;GO:0009733|response to auxin;GO:0008283|cell proliferation;GO:0010016|shoot system morphogenesis;GO:0045892|negative regulation of transcription, DNA-templated;cellular_component:GO:0005634|nucleus;molecular_function:GO:0042803|protein homodimerization activity;GO:0043565|sequence-specific DNA binding;GO:0003700|…	gi|728827771|gb|KHG07341.1|	Homeobox-leucine zipper HAT4 -like protein [Gossypium arboreum]
GH_A12G2397	1.85252	1	2.07959	1716.5	8248.24	TRUE	AT4G12490	Bifunctional inhibitor/lipid-transfer protein/seed storage 2S albumin superfamily protein	Q9SU34	ERLL2_ARATH pEARLI1-like lipid transfer protein 2 OS=Arabidopsis thaliana GN=At4g12490 PE=2 SV=1	A0A0D2QW64	A0A0D2QW64_GOSRA Uncharacterized protein OS=Gossypium raimondii GN=B456_004G199900 PE=4 SV=1	zma:103646289	uncharacterized LOC103646289; K02883 large subunit ribosomal protein L18e	PF14547|Hydrophobic seed protein	IPR016140|Bifunctional inhibitor/plant lipid transfer protein/seed storage helical domain;IPR027923|Hydrophobic seed protein	-	gi|823152218|ref|XP_012475941.1|	PREDICTED: 14 kDa proline-rich protein DC2.15-like [Gossypium raimondii] &gt;gi|763754060|gb|KJB21391.1| hypothetical protein B456_004G199900 [Gossypium raimondii]
GH_A12G2402	1.46425	1	4.32733	0	158.722	TRUE	AT4G17260	Lactate/malate dehydrogenase family protein	P22988	LDHA_HORVU L-lactate dehydrogenase A OS=Hordeum vulgare PE=1 SV=1	A0A0B0MZK9	A0A0B0MZK9_GOSAR L-lactate dehydrogenase OS=Gossypium arboreum GN=F383_34168 PE=3 SV=1	tcc:TCM_015995	Lactate	PF00056|lactate/malate dehydrogenase, NAD binding domain	IPR001236|Lactate/malate dehydrogenase, N-terminal;IPR001557|L-lactate/malate dehydrogenase;IPR018177|L-lactate dehydrogenase, active site;IPR022383|Lactate/malate dehydrogenase, C-terminal	biological_process:GO:0019752|carboxylic acid metabolic process;GO:0055114|oxidation-reduction process;GO:0005975|carbohydrate metabolic process;cellular_component:GO:0005829|cytosol;GO:0005886|plasma membrane;molecular_function:GO:0004459|L-lactate dehydrogenase activity;	gi|728828120|gb|KHG07563.1|	L-lactate dehydrogenase B [Gossypium arboreum]
GH_A12G2428	-0.977235	1	-1.33448	1629.96	730.12	TRUE	AT1G12430	armadillo repeat kinesin 3	Q9FZ06	ARK3_ARATH Armadillo repeat-containing kinesin-like protein 3 OS=Arabidopsis thaliana GN=ARK3 PE=1 SV=1	A0A0D2RLC4	A0A0D2RLC4_GOSRA Kinesin-like protein OS=Gossypium raimondii GN=B456_008G240800 PE=3 SV=1	jcu:105645935	armadillo repeat-containing kinesin-like protein 3; K10396 kinesin family member 5	PF00225|Kinesin motor domain	IPR000225|Armadillo;IPR001752|Kinesin motor domain;IPR019821|Kinesin motor domain, conserved site;IPR027640|Kinesin-like protein	biological_process:GO:0007018|microtubule-based movement;cellular_component:GO:0005874|microtubule;molecular_function:GO:0008017|microtubule binding;GO:0003777|microtubule motor activity;GO:0005524|ATP binding;	gi|823213658|ref|XP_012439570.1|	PREDICTED: armadillo repeat-containing kinesin-like protein 3 isoform X1 [Gossypium raimondii] &gt;gi|763784892|gb|KJB51963.1| hypothetical protein B456_008G240800 [Gossypium raimondii]
GH_A12G2441	2.40353	1	5.20602	0	296.281	TRUE	AT4G22880	leucoanthocyanidin dioxygenase	P51091	LDOX_MALDO Leucoanthocyanidin dioxygenase OS=Malus domestica GN=ANS PE=2 SV=1	A0A0B0PZS2	A0A0B0PZS2_GOSAR Leucoanthocyanidin dioxygenase OS=Gossypium arboreum GN=F383_13900 PE=3 SV=1	tcc:TCM_016139	Leucoanthocyanidin dioxygenase isoform 1; K05277 leucoanthocyanidin dioxygenase [EC:1.14.11.19]	PF14226|non-haem dioxygenase in morphine synthesis N-terminal	IPR005123|Oxoglutarate/iron-dependent dioxygenase;IPR026992|Non-haem dioxygenase N-terminal domain	biological_process:GO:0055114|oxidation-reduction process;molecular_function:GO:0046872|metal ion binding;GO:0051213|dioxygenase activity;	gi|728850581|gb|KHG30024.1|	Leucoanthocyanidin dioxygenase [Gossypium arboreum]
GH_A12G2448	2.20378	1	2.80517	201.941	1650.71	TRUE	AT4G11820	hydroxymethylglutaryl-CoA synthase / HMG-CoA synthase / 3-hydroxy-3-methylglutaryl coenzyme A synthase	P54873	HMCS_ARATH Hydroxymethylglutaryl-CoA synthase OS=Arabidopsis thaliana GN=HMGS PE=1 SV=2	A0A0D2U913	A0A0D2U913_GOSRA Uncharacterized protein OS=Gossypium raimondii GN=B456_008G243100 PE=4 SV=1	tcc:TCM_016163	Hydroxymethylglutaryl-CoA synthase	PF08540|Hydroxymethylglutaryl-coenzyme A synthase C terminal	IPR000590|Hydroxymethylglutaryl-coenzyme A synthase, active site;IPR013528|Hydroxymethylglutaryl-coenzyme A synthase, N-terminal;IPR013746|Hydroxymethylglutaryl-coenzyme A synthase C-terminal domain	biological_process:GO:0008299|isoprenoid biosynthetic process;molecular_function:GO:0004421|hydroxymethylglutaryl-CoA synthase activity;	gi|823213733|ref|XP_012439607.1|	PREDICTED: hydroxymethylglutaryl-CoA synthase-like [Gossypium raimondii] &gt;gi|763784964|gb|KJB52035.1| hypothetical protein B456_008G243100 [Gossypium raimondii]
GH_A12G2451	-0.696769	1	-1.59034	274.063	100.524	TRUE	AT4G22990	Major Facilitator Superfamily with SPX (SYG1/Pho81/XPR1) domain-containing protein	Q93ZQ5	SPXM3_ARATH SPX domain-containing membrane protein At4g22990 OS=Arabidopsis thaliana GN=At4g22990 PE=2 SV=2	A0A0B0PS85	A0A0B0PS85_GOSAR Uncharacterized protein OS=Gossypium arboreum GN=F383_01628 PE=4 SV=1	-	-	PF07690|Major Facilitator Superfamily	IPR004331|SPX domain;IPR011701|Major facilitator superfamily	biological_process:GO:0055085|transmembrane transport;cellular_component:GO:0016021|integral component of membrane;	gi|728849855|gb|KHG29298.1|	hypothetical protein F383_01628 [Gossypium arboreum]
GH_A12G2462	-0.806048	1	-1.45469	504.853	206.338	TRUE	AT4G11660	winged-helix DNA-binding transcription factor family protein	Q9T0D3	HFB2B_ARATH Heat stress transcription factor B-2b OS=Arabidopsis thaliana GN=HSFB2B PE=2 SV=1	A0A0D2TC18	A0A0D2TC18_GOSRA Uncharacterized protein OS=Gossypium raimondii GN=B456_008G244400 PE=3 SV=1	jcu:105645856	heat stress transcription factor B-2b; K09419 heat shock transcription factor, other eukaryote	PF00447|HSF-type DNA-binding	IPR000232|Heat shock factor (HSF)-type, DNA-binding;IPR027725|Heat shock transcription factor family	biological_process:GO:0045892|negative regulation of transcription, DNA-templated;cellular_component:GO:0005634|nucleus;molecular_function:GO:0043565|sequence-specific DNA binding;GO:0003700|transcription factor activity, sequence-specific DNA binding;	gi|763784985|gb|KJB52056.1|	hypothetical protein B456_008G244400 [Gossypium raimondii]
GH_A12G2464	-1.03371	1	-1.66249	584.188	206.338	TRUE	AT1G12780	UDP-D-glucose/UDP-D-galactose 4-epimerase 1	Q42605	UGE1_ARATH Bifunctional UDP-glucose 4-epimerase and UDP-xylose 4-epimerase 1 OS=Arabidopsis thaliana GN=UGE1 PE=1 SV=2	A0A0B0MF11	A0A0B0MF11_GOSAR Uncharacterized protein OS=Gossypium arboreum GN=F383_22056 PE=3 SV=1	tcc:TCM_016202	UDP-D-glucose	PF16363|GDP-mannose 4,6 dehydratase	IPR008089|Nucleotide sugar epimerase;IPR016040|NAD(P)-binding domain	biological_process:GO:0006012|galactose metabolic process;molecular_function:GO:0003978|UDP-glucose 4-epimerase activity;	gi|728812232|gb|KHG00723.1|	hypothetical protein F383_22056 [Gossypium arboreum]
GH_A12G2467	1.93721	1	4.76545	0	216.92	TRUE	AT4G11650	osmotin 34	P50700	OSL3_ARATH Osmotin-like protein OSM34 OS=Arabidopsis thaliana GN=OSM34 PE=2 SV=2	Q2HPG3	Q2HPG3_GOSHI Osmotin-like protein I OS=Gossypium hirsutum GN=OSMI PE=4 SV=1	zma:103640102	nuclear pore complex protein Nup96 homolog; K14297 nuclear pore complex protein Nup98-Nup96	PF00314|Thaumatin family	IPR001938|Thaumatin;IPR017949|Thaumatin, conserved site	-	gi|823213773|ref|XP_012439628.1|	PREDICTED: protein P21 [Gossypium raimondii]
GH_A12G2486	-0.706181	1	-1.40448	425.519	179.885	TRUE	ATCG00680	photosystem II reaction center protein B	A0ZZ61	PSBB_GOSBA Photosystem II CP47 reaction center protein OS=Gossypium barbadense GN=psbB PE=3 SV=1	E0XDY5	E0XDY5_9ASTR Photosystem II cp47 protein (Fragment) OS=Pentaphragma sp. Duangjai 49 GN=psbB PE=4 SV=1	jcu:7564760	psbB, JacuC_p046; photosystem II 47 kDa protein; K02704 photosystem II CP47 chlorophyll apoprotein	PF00421|Photosystem II protein	IPR000932|Photosystem antenna protein-like	biological_process:GO:0018298|protein-chromophore linkage;GO:0009772|photosynthetic electron transport in photosystem II;cellular_component:GO:0009535|chloroplast thylakoid membrane;GO:0009523|photosystem II;GO:0016021|integral component of membrane;molecular_function:GO:0016168|chlorophyll binding;GO:0045156|electron transporter, transferring electrons within the cyclic electron transport pathwa…	gi|119368525|ref|YP_913213.1|	PSII 47kD protein [Gossypium barbadense] &gt;gi|221272379|sp|A0ZZ61.1|PSBB_GOSBA RecName: Full=Photosystem II CP47 reaction center protein; AltName: Full=PSII 47 kDa protein; AltName: Full=Protein CP-47 &gt;gi|119224887|dbj|BAF41273.1| PSII 47kD protein [Gossypium barbadense]
GH_D02G0601	-1.34613	1	-1.98051	656.309	185.175	TRUE	AT3G12410	Polynucleotidyl transferase%2C ribonuclease H-like superfamily protein	Q84LH3	WEX_ARATH Werner Syndrome-like exonuclease OS=Arabidopsis thaliana GN=WEX PE=1 SV=1	A0A0D2PNS2	A0A0D2PNS2_GOSRA Uncharacterized protein OS=Gossypium raimondii GN=B456_005G068300 PE=4 SV=1	-	-	PF01612|3'-5' exonuclease	IPR002562|3'-5' exonuclease domain	biological_process:GO:0090305|nucleic acid phosphodiester bond hydrolysis;molecular_function:GO:0008408|3'-5' exonuclease activity;GO:0003676|nucleic acid binding;	gi|823162467|ref|XP_012481179.1|	PREDICTED: Werner Syndrome-like exonuclease [Gossypium raimondii] &gt;gi|763761509|gb|KJB28763.1| hypothetical protein B456_005G068300 [Gossypium raimondii]
GH_D02G0616	0.660592	1	1.29199	223.578	634.887	TRUE	AT1G48100	Pectin lyase-like superfamily protein	Q949Z1	PGLR4_ARATH Polygalacturonase At1g48100 OS=Arabidopsis thaliana GN=At1g48100 PE=2 SV=1	A0A0D2PNW4	A0A0D2PNW4_GOSRA Uncharacterized protein OS=Gossypium raimondii GN=B456_005G069900 PE=3 SV=1	pda:103722672	polygalacturonase At1g48100-like; K01213 galacturan 1,4-alpha-galacturonidase [EC:3.2.1.67]	PF00295|Glycosyl hydrolases family 28	IPR000743|Glycoside hydrolase, family 28;IPR006626|Parallel beta-helix repeat	biological_process:GO:0071555|cell wall organization;GO:0005975|carbohydrate metabolic process;cellular_component:GO:0005576|extracellular region;molecular_function:GO:0004650|polygalacturonase activity;GO:0016829|lyase activity;	gi|823164613|ref|XP_012482249.1|	PREDICTED: polygalacturonase At1g48100-like isoform X1 [Gossypium raimondii]
GH_D02G0633	-0.888323	1	-2.21183	230.79	52.9072	TRUE	AT1G48210	Protein kinase superfamily protein	Q41328	PTI1_SOLLC Pto-interacting protein 1 OS=Solanum lycopersicum GN=PTI1 PE=1 SV=2	A0A0B0N576	A0A0B0N576_GOSAR Pto-interacting 1 OS=Gossypium arboreum GN=F383_07448 PE=4 SV=1	tcc:TCM_021484	Receptor-like protein kinase; K13436 pto-interacting protein 1 [EC:2.7.11.1]	PF07714|Protein tyrosine kinase	IPR000719|Protein kinase domain;IPR001245|Serine-threonine/tyrosine-protein kinase catalytic domain;IPR008271|Serine/threonine-protein kinase, active site;IPR017441|Protein kinase, ATP binding site	biological_process:GO:0006468|protein phosphorylation;cellular_component:GO:0016021|integral component of membrane;molecular_function:GO:0005524|ATP binding;GO:0004674|protein serine/threonine kinase activity;	gi|728825513|gb|KHG06281.1|	Pto-interacting 1 [Gossypium arboreum]
GH_D02G0674	-1.77111	1	-3.48485	201.941	15.8722	TRUE	AT1G36240	Ribosomal protein L7Ae/L30e/S12e/Gadd45 family protein	O49884	RL30_LUPLU 60S ribosomal protein L30 OS=Lupinus luteus GN=RPL30 PE=3 SV=1	A0A0D2S4D9	A0A0D2S4D9_GOSRA Uncharacterized protein OS=Gossypium raimondii GN=B456_004G227600 PE=4 SV=1	cam:101510915	60S ribosomal protein L30-like; K02908 large subunit ribosomal protein L30e	PF01248|Ribosomal protein L7Ae/L30e/S12e/Gadd45 family	IPR000231|Ribosomal protein L30e;IPR004038|Ribosomal protein L7Ae/L30e/S12e/Gadd45;IPR022991|Ribosomal protein L30e, conserved site	biological_process:GO:0006412|translation;cellular_component:GO:0005840|ribosome;molecular_function:GO:0003735|structural constituent of ribosome;	gi|763758829|gb|KJB26160.1|	hypothetical protein B456_004G227600 [Gossypium raimondii]
GH_D02G0691	0.812016	1	1.18256	706.795	1830.59	TRUE	AT1G71695	Peroxidase superfamily protein	Q96520	PER12_ARATH Peroxidase 12 OS=Arabidopsis thaliana GN=PER12 PE=1 SV=1	A0A0D2RAZ7	A0A0D2RAZ7_GOSRA Peroxidase OS=Gossypium raimondii GN=B456_005G077600 PE=3 SV=1	tcc:TCM_035691	Peroxidase; K00430 peroxidase [EC:1.11.1.7]	PF00141|Peroxidase	IPR000823|Plant peroxidase;IPR002016|Haem peroxidase, plant/fungal/bacterial;IPR019793|Peroxidases heam-ligand binding site;IPR019794|Peroxidase, active site	biological_process:GO:0006979|response to oxidative stress;GO:0042744|hydrogen peroxide catabolic process;GO:0098869|cellular oxidant detoxification;GO:0055114|oxidation-reduction process;cellular_component:GO:0005576|extracellular region;molecular_function:GO:0004601|peroxidase activity;GO:0020037|heme binding;GO:0046872|metal ion binding;	gi|823164918|ref|XP_012482403.1|	PREDICTED: peroxidase 12 [Gossypium raimondii] &gt;gi|763761715|gb|KJB28969.1| hypothetical protein B456_005G077600 [Gossypium raimondii]
GH_D02G0693	1.18483	1	3.07357	7.21219	132.268	TRUE	AT4G09890	mediator of RNA polymerase II transcription subunit%2C putative (DUF3511)	-	-	A0A0D2SCJ8	A0A0D2SCJ8_GOSRA Uncharacterized protein OS=Gossypium raimondii GN=B456_005G077700 PE=4 SV=1	-	-	PF12023|Domain of unknown function (DUF3511)	IPR021899|Protein of unknown function DUF3511	-	gi|763761716|gb|KJB28970.1|	hypothetical protein B456_005G077700 [Gossypium raimondii]
GH_D02G0704	-0.525238	1	-0.695805	5712.06	3994.5	TRUE	AT1G76850	exocyst complex component sec5	Q8S3U9	SEC5A_ARATH Exocyst complex component SEC5A OS=Arabidopsis thaliana GN=SEC5A PE=1 SV=1	A0A0D2N989	A0A0D2N989_GOSRA Uncharacterized protein OS=Gossypium raimondii GN=B456_005G079300 PE=4 SV=1	tcc:TCM_035548	Exocyst complex component sec5 isoform 1; K17637 exocyst complex component 2	PF15469|Exocyst complex component Sec5	IPR029175|Exocyst complex component EXOC2/Sec5	biological_process:GO:0006893|Golgi to plasma membrane transport;cellular_component:GO:0000145|exocyst;	gi|823164953|ref|XP_012482420.1|	PREDICTED: exocyst complex component SEC5A-like isoform X1 [Gossypium raimondii] &gt;gi|823164955|ref|XP_012482421.1| PREDICTED: exocyst complex component SEC5A-like isoform X1 [Gossypium raimondii] &gt;gi|763761743|gb|KJB28997.1| hypothetical protein B456_005G079300 [Gossypium raimondii] &gt;gi|763761746|gb|KJB29000.1| hypothetical protein B456_005G079300 [Gossypium raimondii]
GH_D02G0713	0.980913	1	1.17708	2618.03	6719.22	TRUE	AT1G21310	extensin 3	Q9FS16	EXTN3_ARATH Extensin-3 OS=Arabidopsis thaliana GN=EXT3 PE=2 SV=3	A0A022QY01	A0A022QY01_ERYGU Uncharacterized protein OS=Erythranthe guttata GN=MIMGU_mgv1a018797mg PE=4 SV=1	obr:102707232	BUD13 homolog; K13106 pre-mRNA-splicing factor CWC26	-	-	-	gi|823164994|ref|XP_012482439.1|	PREDICTED: extensin-3-like isoform X2 [Gossypium raimondii]
GH_D02G0715	1.17595	1	1.78252	223.578	894.132	TRUE	AT1G43670	Inositol monophosphatase family protein	Q42649	F16P2_BETVU Fructose-1,6-bisphosphatase, cytosolic OS=Beta vulgaris PE=2 SV=2	A0A0D2RB60	A0A0D2RB60_GOSRA Uncharacterized protein OS=Gossypium raimondii GN=B456_005G080300 PE=3 SV=1	tcc:TCM_035507	Inositol monophosphatase family protein isoform 1; K03841 fructose-1,6-bisphosphatase I [EC:3.1.3.11]	PF00316|Fructose-1-6-bisphosphatase, N-terminal domain	IPR000146|Fructose-1,6-bisphosphatase class 1;IPR020548|Fructose-1,6-bisphosphatase, active site;IPR028343|Fructose-1,6-bisphosphatase;IPR033391|Fructose-1-6-bisphosphatase class I, N-terminal	biological_process:GO:0016311|dephosphorylation;GO:0005975|carbohydrate metabolic process;cellular_component:GO:0016021|integral component of membrane;molecular_function:GO:0042132|fructose 1,6-bisphosphate 1-phosphatase activity;	gi|823164996|ref|XP_012482440.1|	PREDICTED: fructose-1,6-bisphosphatase, cytosolic-like [Gossypium raimondii] &gt;gi|763761770|gb|KJB29024.1| hypothetical protein B456_005G080300 [Gossypium raimondii]
GH_D02G0728	0.84583	1	0.985367	5409.14	12142.2	TRUE	AT1G77120	alcohol dehydrogenase 1	P06525	ADH1_ARATH Alcohol dehydrogenase class-P OS=Arabidopsis thaliana GN=ADH1 PE=1 SV=2	A0A0D2N9E1	A0A0D2N9E1_GOSRA Uncharacterized protein OS=Gossypium raimondii GN=B456_005G082400 PE=3 SV=1	tcc:TCM_035433	Alcohol dehydrogenase 1; K18857 alcohol dehydrogenase class-P [EC:1.1.1.1]	PF08240|Alcohol dehydrogenase GroES-like domain	IPR002085|Alcohol dehydrogenase superfamily, zinc-type;IPR002328|Alcohol dehydrogenase, zinc-type, conserved site;IPR013149|Alcohol dehydrogenase, C-terminal;IPR013154|Alcohol dehydrogenase, N-terminal	biological_process:GO:0055114|oxidation-reduction process;molecular_function:GO:0016491|oxidoreductase activity;GO:0008270|zinc ion binding;	gi|823165063|ref|XP_012482470.1|	PREDICTED: alcohol dehydrogenase class-P [Gossypium raimondii] &gt;gi|763761803|gb|KJB29057.1| hypothetical protein B456_005G082400 [Gossypium raimondii]
GH_D02G0746	0.517369	1	2.23111	21.6366	148.14	TRUE	AT1G77060	Phosphoenolpyruvate carboxylase family protein	O49290	CPPM_ARATH Carboxyvinyl-carboxyphosphonate phosphorylmutase, chloroplastic OS=Arabidopsis thaliana GN=At1g77060 PE=2 SV=2	A0A0D2N9C4	A0A0D2N9C4_GOSRA Uncharacterized protein OS=Gossypium raimondii GN=B456_005G083900 PE=4 SV=1	fve:101311703	isocitrate lyase; K01637 isocitrate lyase [EC:4.1.3.1]	PF13714|Phosphoenolpyruvate phosphomutase	IPR018523|Isocitrate lyase/phosphorylmutase, conserved site	biological_process:GO:0008152|metabolic process;molecular_function:GO:0003824|catalytic activity;	gi|823165102|ref|XP_012482490.1|	PREDICTED: carboxyvinyl-carboxyphosphonate phosphorylmutase, chloroplastic [Gossypium raimondii] &gt;gi|763761778|gb|KJB29032.1| hypothetical protein B456_005G083900 [Gossypium raimondii]
GH_D02G0753	0.530307	1	0.98652	476.005	1079.31	TRUE	AT1G76990	ACT domain repeat 3	O49285	ACR3_ARATH ACT domain-containing protein ACR3 OS=Arabidopsis thaliana GN=ACR3 PE=2 SV=1	A0A0D2PPW2	A0A0D2PPW2_GOSRA Uncharacterized protein OS=Gossypium raimondii GN=B456_005G084700 PE=4 SV=1	mdm:103415977	GTP-binding protein At2g22870-like; K03978 GTP-binding protein	PF01842|ACT domain	IPR002912|ACT domain	biological_process:GO:0008152|metabolic process;molecular_function:GO:0016597|amino acid binding;	gi|823165114|ref|XP_012482497.1|	PREDICTED: ACT domain-containing protein ACR3 isoform X1 [Gossypium raimondii] &gt;gi|823165116|ref|XP_012482498.1| PREDICTED: ACT domain-containing protein ACR3 isoform X1 [Gossypium raimondii] &gt;gi|763761854|gb|KJB29108.1| hypothetical protein B456_005G084700 [Gossypium raimondii] &gt;gi|763761855|gb|KJB29109.1| hypothetical protein B456_005G084700 [Gossypium raimondii] &gt;gi|763761856|gb|KJ…
